# Supplementary material
Source: publisher figshare collection journal article supplement (https://acs.figshare.com/ndownloader/files/4082197)
Supplement: Supplementary file 1 [file 4082197]

# Supporting Information

## Water Sorption and Glass Transition of Pig Gastric Mucin Studied by QCM-D

*Yana Znamenskaya<sup>†</sup>, Javier Sotres<sup>†</sup>, Sergei Gavryushov<sup>‡</sup>, Johan Engblom<sup>†</sup>, Thomas Arnebrant<sup>†</sup> and Vitaly Kocherbitov<sup>\*†</sup>*

<sup>†</sup> Biomedical Science, Faculty of Health and Society, Malmö University, SE-205 06 Malmö, Sweden

<sup>‡</sup> On leave from Engelhardt Institute of Molecular Biology RAS, Moscow, Russia

\*Corresponding author. Address: Faculty of Health and Society, Malmö University, SE-205 06 Malmö, Sweden. E-mail: [vitaly.kocherbitov@mah.se](mailto:vitaly.kocherbitov@mah.se)

**Figure S1.** The dependence of dissipation changes on time at low RH. It presents a zoomed area of the dissipation changes at low RH.

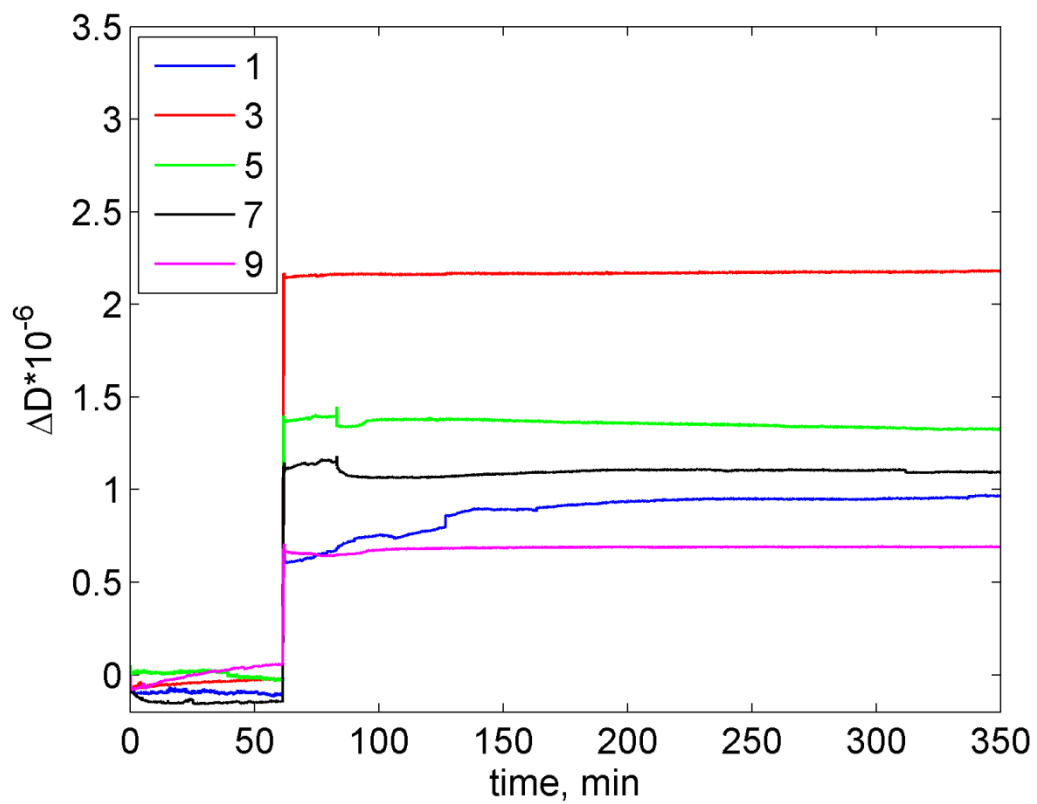

**Figure S2.**  $\Delta f/n$  versus  $n^{-\frac{1}{2}}$  at different PGM film thickness: 236 nm (red), 262 nm (blue)

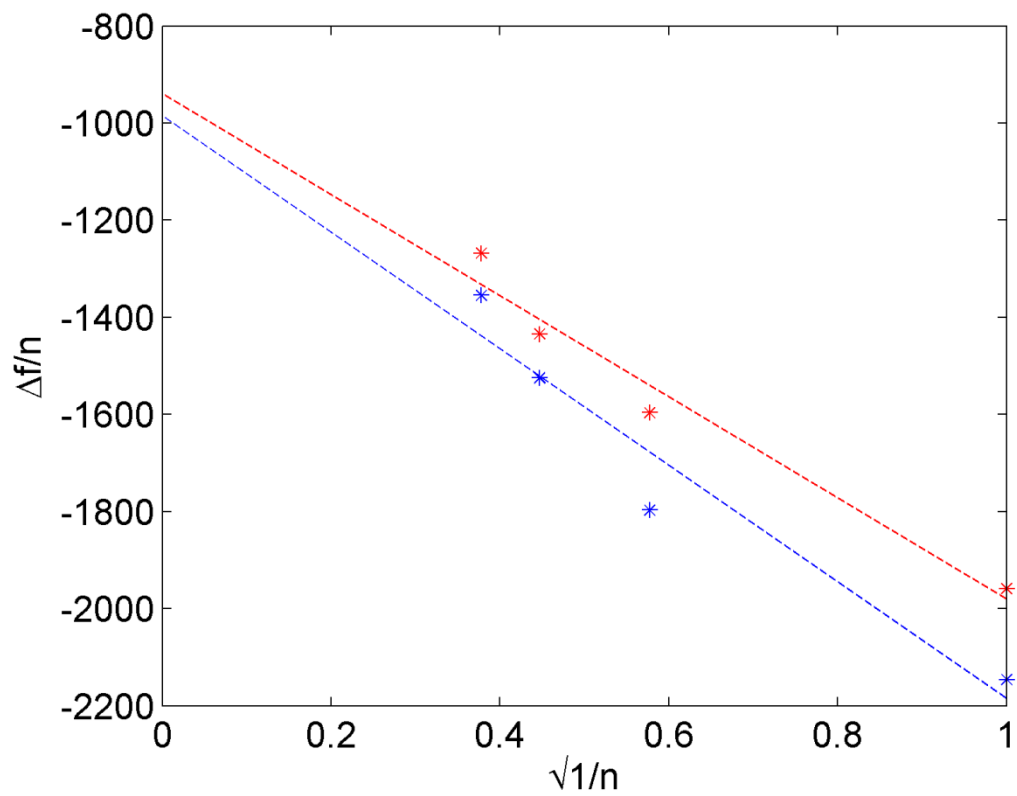

**Figure S3.** Sauerbrey masses of the water absorbed by the PGM film obtained by QCM-D and compared with water sorption isotherm studied by sorption calorimetry. Dashed line- sorption calorimetric data;<sup>1</sup> stars- QCM-D data, corresponding to different overtones (blue-1, red-3, green-5, black-7). The thickness of PGM film is 541 nm.

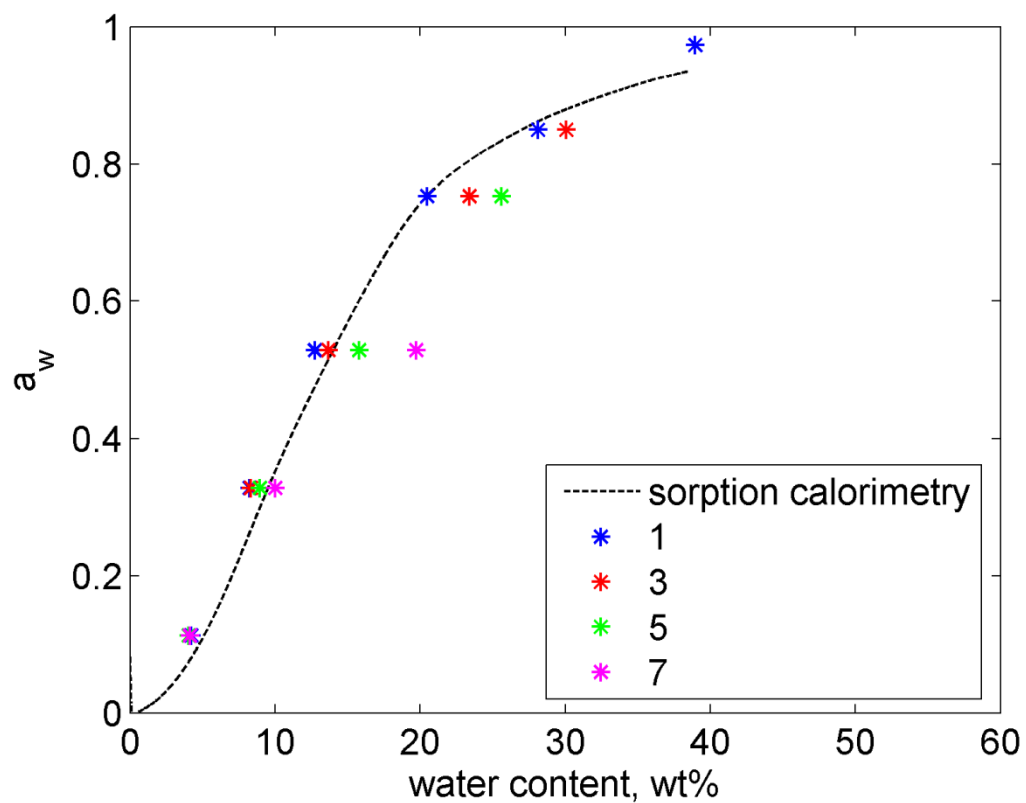

**Figure S4.** The parameter  $b$  (which defines the rheological properties of the PGM film) versus  $a_w$  for different PGM film thicknesses.

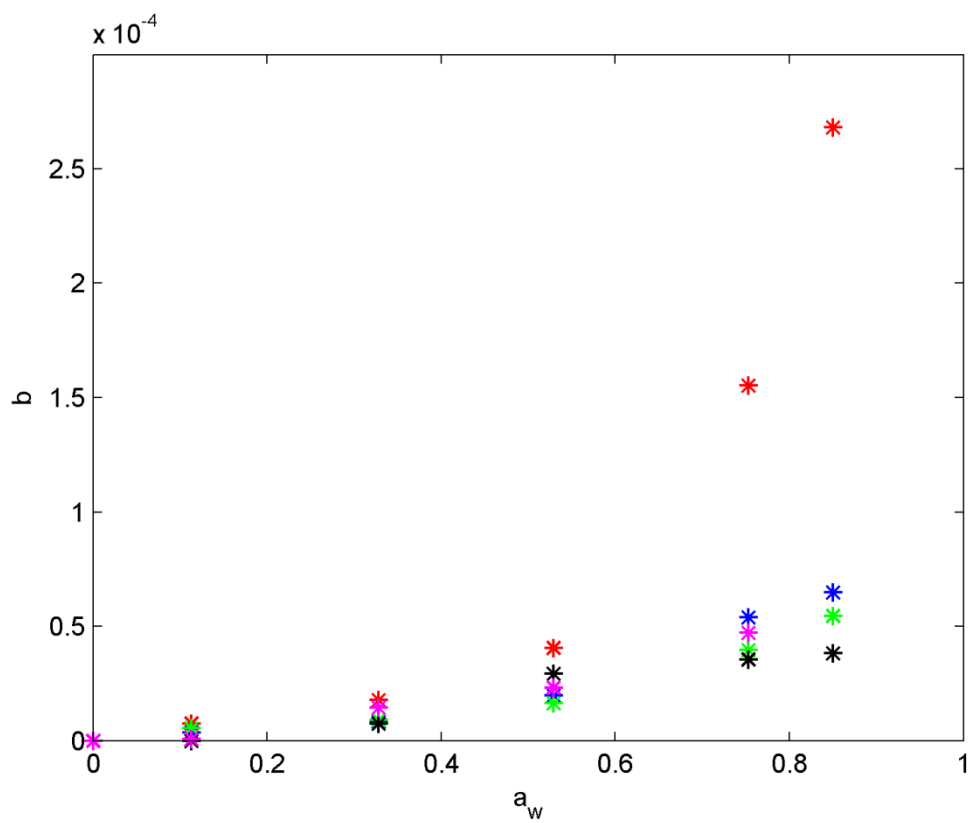

## SI. Derivation of a formula for calculation of water content

The data on the frequency change normalized to overtone number of coated SiO<sub>2</sub> sensor with respect to uncoated sensor were analyzed using the equation for a single viscoelastic film<sup>2</sup> in air, where the frequency shift  $\frac{\Delta f}{n}$  is proportional to square of the overtone order  $n^2$ :

$$\frac{\Delta f}{n} = \frac{-2f_0^2 m_f}{Z_q} \left( 1 + \frac{1}{3} \frac{Z_q^2}{Z_f^2} \left( \frac{m_f}{m_q} n\pi \right)^2 \right) \quad (S1)$$

where  $Z_q = 8.8 \cdot 10^6 \text{ kg m}^{-2} \text{ s}^{-1}$  - the acoustic or mechanical impedance of quartz;  $Z_f = \sqrt{\rho(G' + G'')}$  - the acoustic impedance of the film;  $f_0$  - the fundamental frequency;  $m_f$  - the mass of the film per unit area;  $m_q$  - is the areal mass density of the crystal.

The eq S1 was simplified in the following way:

$$\frac{\Delta f}{n} = -am_f(1 + bm_f^2 n^2) \quad (S2)$$

where  $a = \frac{2f_0^2}{Z_q}$  and  $b = \frac{1}{3} \frac{Z_q^2 \pi^2}{Z_f^2 m_q^2}$ .

The frequency changes normalized to the overtone number is found as a frequency of each overtone at each RH for coated sensor with PGM film in respect to empty (uncoated) sensor:

$$\frac{\Delta f}{n} = \frac{f_f}{n} - \frac{f_e}{n} \quad (S3)$$

The frequency change for the dry PGM film is found as a frequency of each overtone at each RH for coated sensor with dry PGM film in respect to empty (uncoated) sensor:

$$\frac{\Delta f_d}{n} = \frac{f_d}{n} - \frac{f_e}{n} \quad (S4)$$

Combining eq S3 and S4, one gets:

$$\frac{\Delta f}{n} = \frac{f_f}{n} + \frac{\Delta f_d}{n} - \frac{f_e}{n} = \frac{\Delta f_w}{n} + \frac{\Delta f_d}{n} \quad (S5)$$

Combining eq S2 and S5, one can write:

$$\frac{\Delta f_w}{n} + \frac{\Delta f_d}{n} = -am_f(1 + bm_f^2 n^2) \quad (S6)$$

The mass of the dry film was calculated using Sauerbrey<sup>3</sup> equation:

$$\frac{\Delta f_d}{n} = -am_d \quad (S7)$$

where  $a = \frac{2f_0^2}{z_q}$  from the eq S1.

Then eq S6 will be:

$$\frac{\Delta f_w}{n} = -am_f(1 + bm_f^2 n^2) + am_d = -am_w - abm_f^3 n^2 \quad (S8)$$

Let us introduce the Sauerbrey mass of the water absorbed by PGM film:

$$\frac{\Delta f_w}{n} = -am_w^s \quad (S9)$$

Then eq S8 will be:

$$-am_w^s = -am_w - abm_f^3 n^2 \quad (S10)$$

After eq S10 was simplified and data on calculated mass of water absorbed by PGM film were normalized to the to the dry mass of PGM film,  $\bar{m}_d$ , the water content per dry mucin can be extrapolated to the zero overtone, using the following eq:

$$\frac{m_w^s}{\bar{m}_d} = \frac{m_w}{\bar{m}_d} + b \frac{m_f^3}{\bar{m}_d} n^2 \quad (S11)$$

## SII. Derivation of a formula for calculation the ratio of the storage to the loss modulus

$$G'/G''$$

Viscoelastic properties can be extracted from the equation for a single viscoelastic film in air:<sup>2</sup>

$$\Delta\tilde{f} = -\frac{f_0}{\pi Z_q} Z_f \tan(k_f d_f) \quad (\text{S12})$$

where  $k_f$  is the wavenumber in the film;  $d_f$  is the film thickness. If  $k_f d_f$  is much less than unity, the tangent in eq S13 can be Taylor-expanded as  $\tan(x) \approx x + 1/3 x^3$ , resulting in the following:

$$\frac{\Delta\tilde{f}}{f_0} = -\frac{1}{\pi Z_q} \omega m_f \left( 1 + \frac{1}{3} \frac{Z_q^2}{Z_f^2} \left( \frac{m_f}{m_d} n\pi \right)^2 \right) \quad (\text{S13})$$

$$-\frac{\Delta\tilde{f}\pi Z_q}{f_0 \omega m_f} = 1 + \frac{1}{3} \frac{Z_q^2}{Z_f^2} \left( \frac{m_f}{m_q} \right)^2 \quad (\text{S14})$$

$$\frac{1}{Z_f^2} = \frac{1}{\rho_f G_f} = \frac{3}{Z_q^2 \left( \frac{m_f}{m_q} n\pi \right)^2} \left( -\frac{\Delta\tilde{f}\pi Z_q}{f_0 \omega m_f} - 1 \right) \quad (\text{S15})$$

Multiplying the numerator and denominator of  $\frac{1}{G_f}$  by the complex conjugate of  $G_f$ ,

$$\frac{1}{G_f} = \frac{\bar{G}}{|G|^2} = \frac{G' - iG''}{(G')^2 + (G'')^2} \quad (\text{S16})$$

one can write:

$$G' - iG'' = \frac{3\rho((G')^2 + (G'')^2)}{Z_q^2 \left( \frac{m_f}{m_q} n\pi \right)^2} \left( -\frac{\Delta\tilde{f}\pi Z_q}{f_0 \omega m_f} - 1 \right) \quad (\text{S17})$$

Denoting  $k$  for the expression

$$k = \frac{3\rho((G')^2 + (G'')^2)}{Z_q^2 \left( \frac{m_f}{m_q} n\pi \right)^2} \quad (\text{S18})$$



we obtain:

$$G' - iG'' = k \left( -\frac{(\Delta f + i\Delta\Gamma)\pi Z_q}{f_0 \omega m_f} - 1 \right) \quad (\text{S19})$$

$$G' - iG'' = -\frac{\Delta f \pi Z_q k}{f_0 \omega m_f} - \frac{i\Delta\Gamma \pi Z_q k}{f_0 \omega m_f} - k \quad (\text{S20})$$

and

$$G' = -\frac{\Delta f \pi Z_q k}{f_0 \omega m_f} - k \quad (\text{S21})$$

$$-iG'' = -\frac{i\Delta\Gamma \pi Z_q k}{f_0 \omega m_f} \quad (\text{S22})$$

Thus, the ratio of the storage modulus to the loss modulus  $\frac{G'}{G''}$ , can be calculated as:

$$\frac{G'}{G''} = -\frac{\Delta f + \frac{2f_0 n m_f}{Z_q}}{\Delta\Gamma} = -\frac{\Delta f + \left(\frac{\Delta f}{n}\right)_{extrap} n}{\Delta\Gamma} \quad (\text{S23})$$

- References

(1) Znamenskaya, Y.; Sotres, J.; Engblom, J.; Arnebrant, T.; Kocherbitov, V. Effect of Hydration on Structural and Thermodynamic Properties of Pig Gastric and Bovine Submaxillary Gland Mucins *J. Phys. Chem. B* **2012**, *116*, 5047-5055.

(2) Johannsmann, D. Viscoelastic Analysis of Organic Thin Films on Quartz Resonators *Macromol. Chem. Phys.* **1999**, *200*, 501-516.

(3) Sauerbrey, G. Verwendung Von Schwingquarzen Zur Wägung Dünner Schichten Und Zur Mikrowägung *Zeitschrift für Physik A Hadrons and Nuclei* **1959**, *155*, 206-222.
